## Modelling the nuclear envelope of *HeLa* cells

Cefa Karabağ<sup>1,3</sup>, Martin L. Jones<sup>2</sup>, Christopher J. Peddie<sup>2</sup>, Anne E. Weston<sup>2</sup>,  
Lucy M. Collinson<sup>2</sup>, and Constantino Carlos Reyes-Aldasoro<sup>1,3</sup>

<sup>1</sup> City, University of London, Northampton Square EC1V 0HB, UK,

<sup>2</sup> Electron Microscopy Science Technology Platform, The Francis Crick Institute,  
London NW1 1AT, UK

<sup>3</sup> Corresponding authors [cefa.karabag.1@city.ac.uk](mailto:cefa.karabag.1@city.ac.uk) [reyes@city.ac.uk](mailto:reyes@city.ac.uk)

**Abstract.** This paper describes a framework for the automatic segmentation of the nuclear envelope of cancerous HeLa cells and the modelling of the volumetric shape against an ellipsoid. The framework is automatic and unsupervised and reported a Jaccard Similarity Index of 0.968 against a manual segmentation. The modelling of the surface provides a visual display of the variations, both smooth and rugged over the surface, and measurements can be extracted with the expectation that they can correlate with the biological characteristics of the cells.

**Keywords:** Automatic Nuclear Segmentation, HeLa Nuclear Shape

### 1 Introduction

The field of *Computational Pathology* has grown in recent years bringing together computational and mathematical methods that are applied to disease-related data sets [1]. Computational pathology can combine various sources of data such as medical records, laboratory data, genomics, proteomics, and a variety of images with different stainings, antibodies and biomarkers [2, 3]. Some of its aims are to quantify pathological data with various techniques such as machine learning [4] to enable the best possible medical decisions [5]. The automation of the acquisition, especially through the use of whole slide imaging [6] and high-throughput microscopic equipment, has been instrumental in the development field. Labs can now acquire tens of thousands of data sets that can easily exceed gigabytes of data every month [7]. Previous work has applied computer-based image analysis for cell detection and classification [8], tissue classification [9], nuclei and mitosis detection [10], microvessel segmentation [11] and other immunohistochemistry scoring tasks [12] in histopathological images.

Generally, although not exclusively, the images associated with computational pathology are light or fluorescence microscopy and stained through immunohistochemistry. Less frequently considered are images observed with electron microscopy (EM), phase contrast and differential interference contrast (DIC) [13]. One important difference between these last modalities and light and fluorescence, is the fact that the intensity of each pixel or voxel is not exclusively related to the presence or absence of a marker or stain, and thus the elements of interest have intensities above and below that of the background. Another

important difference is that EM can provide 3D data sets in a similar way to multiphoton and confocal microscopes, albeit through a destructive process [14, 15]. In addition, in the case of EM, the much higher resolution and magnification changes considerably the problems to solve beyond separating and counting cells and nuclei, or finding their spatial distribution. As there may be a single cell of interest, understanding the nuclear formation [16], the arrangement of chromosomes [17] or the breaching of the nuclear envelope [18] become relevant. The integrity of the nuclear envelope (NE), which separates nucleoplasm and cytoplasm, is of great interest as for some time it has been assumed that the NE breaks down only during mitosis, however, in cases of virus infection or cancer, the NE may remodel outside mitosis [18].

A problem common to all imaging modalities is the determination of a ground truth (GT) against which to validate segmentation results. Despite the significant disadvantages of time and inter- and intra-user variability, manual or semi-automatic delineation of structures like the NE is widely used [19, 20]. Recently, a new approach known as *citizen-science* (CS) [21], has been used to find a GT by leveraging the power of the internet and *an army* of non-experts. The expectation is that out of large enough number of delineations, a useful segmentation with comparable accuracy of that provided by experts can be extracted.

In this paper, a framework to analyse the NE of HeLa cells is presented. The framework extends an automatic segmentation of the NE [22] and models the NE as a 2D surface against a 3D ellipsoid. Distances from the NE to the ellipsoid and the local variation of the distances are calculated with the expectation that they can allow the identification of different biological processes.

## 2 Materials and Methods

### 2.1 Materials: HeLa cells preparation and acquisition

The preparation details of the cell have been published previously, but briefly, wild type HeLa cells were embedded in resin (*Durcupan*) as per the guidelines of the National Centre for Microscopy and Imaging Research (NCMIR) [23].

Images were acquired using a serial blockface scanning electron microscopy (SBF SEM) using a 3View2XP (Gatan, Pleasanton, CA) attached to a Sigma VP SEM (Zeiss, Cambridge). The resolution of the images was  $8192 \times 8192$  pixels over a total of 518 slices, with  $10 \times 10 \times 50$  nm voxel size with 0-255 intensity levels. Individual cells were manually cropped as volumes of interest as substacks of  $2000 \times 2000 \times 300$  voxels (Figs. 1a,d) and were saved as single channel *tif* files.

### 2.2 Ground Truth

Manual delineation of every slice of the data set was performed by an expert who had no further input in the processing of the data. As the HeLa cells can have complicated 3D shapes, in some cases it was necessary for the expert to scroll up and down the slices to determine if a certain region, which appeared disjoint in a certain slice, was part of the nucleus (Figs. 1b,e).

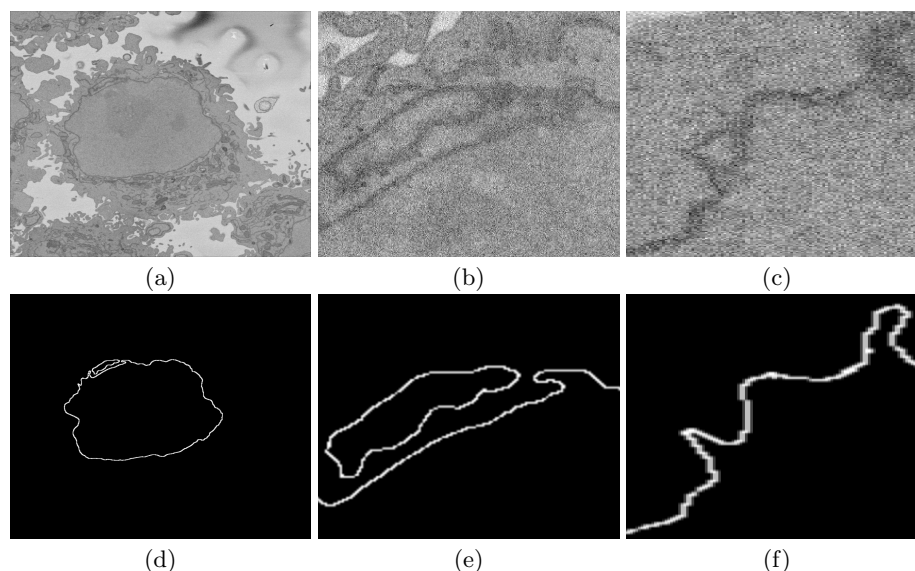

**Fig. 1:** (a) One representative EM image containing one HeLa cell at the centre and fragments of other cells surrounding it. (b,c) Two regions of interest (ROI) which illustrate the difficulty of identifying the nuclear envelope. (d) Manual delineation of the nuclear envelope performed by a single expert. (e,f) Delineations of the ROIs from (b,c). Notice in (b,e) the disjoint region that the expert considered to belong to the nucleus and in (c,f) the uncertainty in some regions of the boundary.

### 2.3 Automatic segmentation of the nuclear envelope

The NE was segmented following the framework described in [22], which is available open-source as Matlab code (<https://github.com/reyesaldasoro/HeLa-Cell-Segmentation>). The framework exploited the darker intensity of the NE as compared with the cytoplasm and the nucleoplasm by Canny edge detection. The edges were then dilated to connect disjoint edges, which were part of the NE, due to intensity variations of the envelope itself (Fig. 2a). The connected pixels not covered by the dilated edges were labelled to create a series of superpixels (Fig. 2b). The superpixel size was not restricted as large superpixels covered the areas of background. Morphological operators were used to: remove regions in contact with the edges of the image, remove small regions and fill holes inside larger regions (Fig. 2c). The central superpixel was selected as the nucleus and further morphological operators were applied to close the jagged edge. Sensitivity analyses to determine the optimal parameters were performed (results not shown).

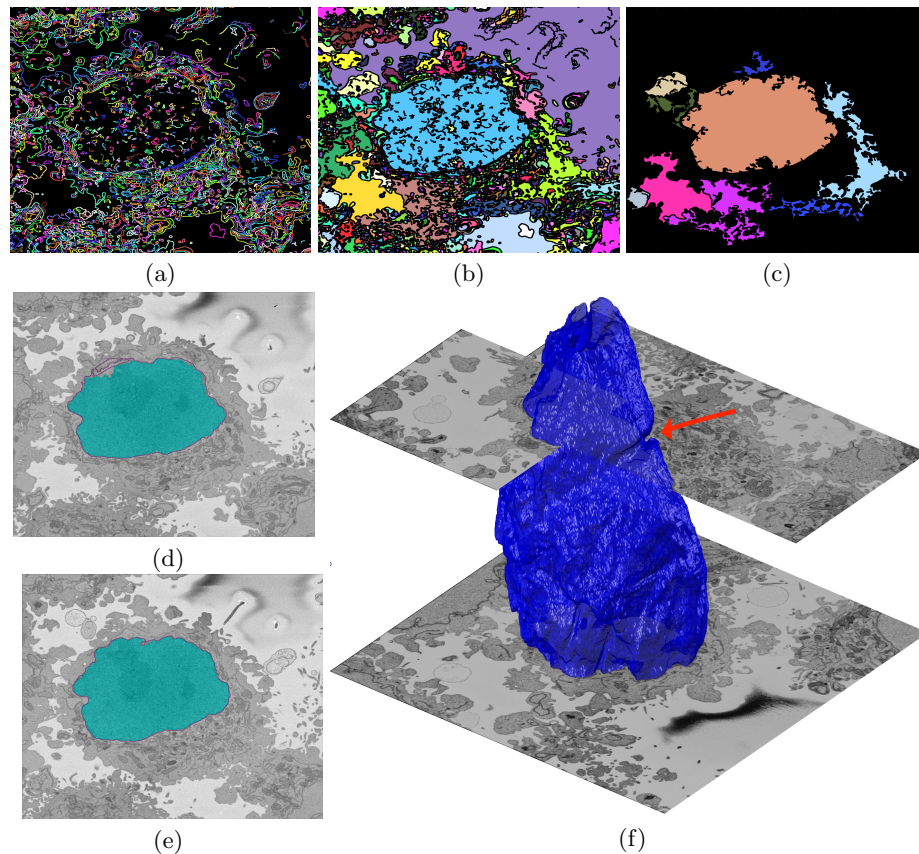

**Fig. 2:** Illustration of the pipeline to segment the nuclear envelope of the HeLa Cell. (a) Edges detected by Canny algorithm. (b) Labelled superpixels. (c) Morphological processing and selection of large superpixels. The edges and the labelled areas have been assigned random colours for visualisation purposes. (d,e) Segmentation of two slices (cyan shades) and the manual segmentation (magenta line). (f) Surface of the NE and partial EM slices to give context. Notice the notch (arrow) on the upper right side of the NE.

#### 2.4 Validation of the segmentation

In order to compare the results of the automated segmentation with the manually segmented GT, the Jaccard Similarity Index (JI) [24] of intersection over union of areas was calculated. For each slice, the manual delineation was morphologically closed to generate a region rather than a line.

#### 2.5 Nuclear envelope shape modelling

To further study the shape of the segmented NE, this was modelled against a 3D ellipsoid. The ellipsoid was adjusted to have the same volume as the nucleus.





6

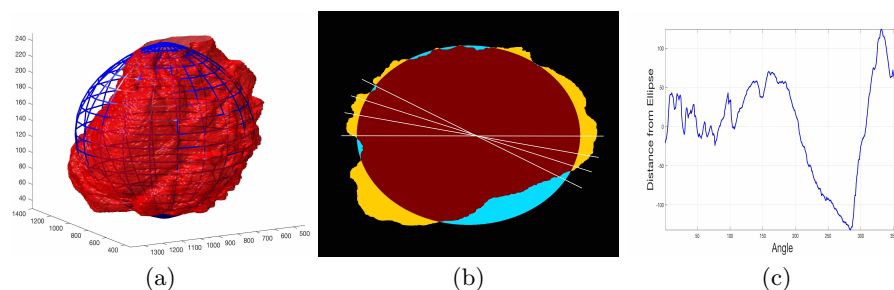

**Fig. 4:** (a) Rendering of the nuclear envelope (red surface) against the model ellipsoid (blue mesh). (b) Illustration of distance calculations by ray tracing in one slice. Yellow regions correspond to the nucleus outside the ellipsoid, cyan regions where nucleus inside the ellipsoid. (c) Measurements obtained along the boundary.

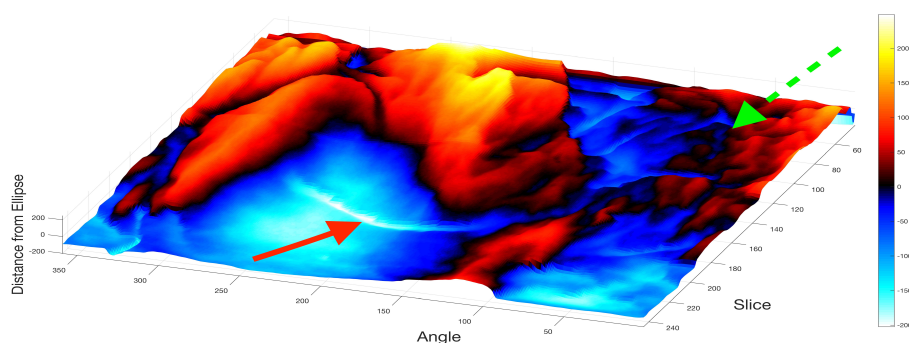

**Fig. 5:** Surface corresponding to the distance from the nuclear envelope to a model ellipsoid. Solid red arrow indicates a notch, dashed green arrow shows rugged region.

## 4 Discussion

The modelling of the NE surface against an ellipsoid can reveal interesting characteristics of the nucleus and the nuclear envelope of a HeLa cancer cell. The 2D maps of the NE surface provides an easier way to assess the characteristics of a 3D structure. Whilst further experimentation with more data sets, and a careful processing of the GTs, is necessary, the framework here described can be useful, as it is fully automated, unsupervised, segmented each slice in approximately 8 seconds and does not require training data.

Future work will concentrate in the segmentation and modelling of a large number of cells, not all of which have a GT segmented by an expert and will be compared against results gathered from the CS approach. For this purpose, a CS project called *Etch a Cell* [25] was created to gather manual segmentations of the NE of HeLa cells.

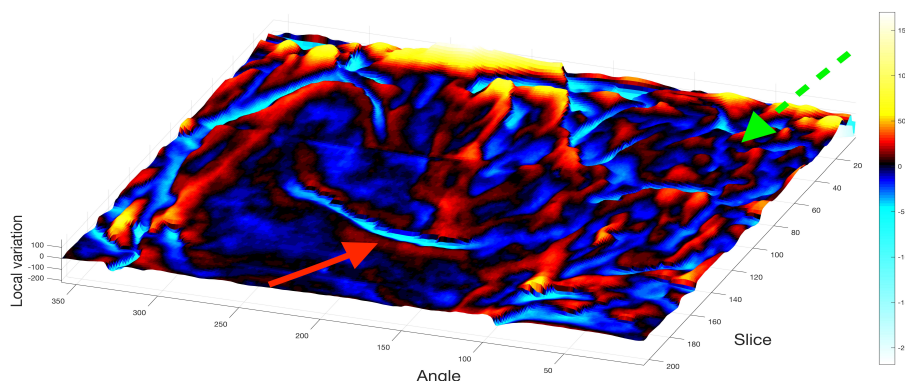

**Fig. 6:** Surface of the local variation of the distances. In both cases, hot shades correspond to positive values and cool shades to negatives. Solid red arrow indicates a notch, dashed green arrow shows rugged region.

## 5 Acknowledgements

This work was supported by the *Francis Crick Institute* which receives its core funding from Cancer Research UK (FC001999), the UK Medical Research Council (FC001999), and the Wellcome Trust (FC001999). The authors acknowledge the *Alan Turing Institute* Data Study Groups and Dr Sebastian Vollmer.

## References

1. Roth, K.A., Almeida, J.S.: Coming into focus: computational pathology as the new big data microscope. *American Journal of Pathology* 185(3), 600–601 (Mar 2015)
2. Fuchs, T.J., Buhmann, J.M.: Computational pathology: challenges and promises for tissue analysis. *Computerized Medical Imaging and Graphics: The Official Journal of the Computerized Medical Imaging Society* 35(7-8), 515–530 (Dec 2011)
3. Huntsman, D.G., Ladanyi, M.: The molecular pathology of cancer: from pan-genomics to post-genomics. *The Journal of Pathology* 244(5), 509–511 (Apr 2018)
4. Gurcan, M.N., Boucheron, L.E., Can, A., Madabhushi, A., Rajpoot, N.M., Yener, B.: Histopathological image analysis: a review. *IEEE Reviews in Biomedical Engineering* 2, 147–71 (2009)
5. Louis, D.N., Gerber, G.K., Baron, J.M., Bry, L., Dighe, A.S., Getz, G., Higgins, J.M., Kuo, F.C., Lane, W.J., Michaelson, J.S., et al.: Computational pathology: An emerging definition. *Archives of Pathology & Laboratory Medicine* 138(9), 1133–1138 (Aug 2014)
6. Park, S., Pantanowitz, L., Parwani, A.V.: Digital imaging in pathology. *Clinics in Laboratory Medicine* 32(4), 557–584 (Dec 2012)
7. Campanella, G., Rajanna, A.R., Corsale, L., Schffler, P.J., Yagi, Y., Fuchs, T.J.: Towards machine learned quality control: A benchmark for sharpness quantification in digital pathology. *Comp. Medical Imaging and Graphics* 65, 142–151 (Apr 2018)
8. Bankhead, P., Loughrey, M.B., Fernandez, J.A., Dombrowski, Y., McArt, D.G., Dunne, P.D., McQuaid, S., Gray, R.T., Murray, L.J., Coleman, H.G., et al.:

- Qupath: Open source software for digital pathology image analysis. *Scientific Reports* 7(1), 16878 (Dec 2017)
9. Kather, J.N., Weis, C.A., Bianconi, F., Melchers, S.M., Schad, L.R., Gaiser, T., Marx, A., Zollner, F.G.: Multi-class texture analysis in colorectal cancer histology. *Scientific Reports* 6, 27988 (Jun 2016)
  10. Veta, M., van Diest, P.J., Kornegoor, R., Huisman, A., Viergever, M.A., Pluim, J.P.W.: Automatic nuclei segmentation in H&E stained breast cancer histopathology images. *PLOS ONE* 8(7), e70221 (Jul 2013)
  11. Kather, J.N., Marx, A., Reyes-Aldasoro, C.C., Schad, L.R., Zollner, F.G., Weis, C.A.: Continuous representation of tumor microvessel density and detection of angiogenic hotspots in histological whole-slide images. *Oncotarget* 6(22), 19163–19176 (Aug 2015)
  12. Akbar, S., Jordan, L.B., Purdie, C.A., Thompson, A.M., McKenna, S.J.: Comparing computer-generated and pathologist-generated tumour segmentations for immunohistochemical scoring of breast tissue microarrays. *British Journal of Cancer* 113(7), 1075–1080 (Sep 2015)
  13. Xing, F., Yang, L.: Robust nucleus/cell detection and segmentation in digital pathology and microscopy images: A comprehensive review. *IEEE Reviews in Biomedical Engineering* 9, 234–263 (2016)
  14. Peddie, C.J., Collinson, L.M.: Exploring the third dimension: Volume electron microscopy comes of age. *Micron* 61, 919 (Jun 2014)
  15. Russell, M.R.G., Lerner, T.R., Burden, J.J., Nkwe, D.O., Pelchen-Matthews, A., Domart, M.C., Durgan, J., Weston, A., Jones, M.L., Peddie, C.J., et al.: 3D correlative light and electron microscopy of cultured cells using serial blockface scanning electron microscopy. *Journal of Cell Science* 130(1), 278–291 (Jan 2017)
  16. Lu, L., Ladinsky, M.S., Kirchhausen, T.: Formation of the postmitotic nuclear envelope from extended ER cisternae precedes nuclear pore assembly. *The Journal of Cell Biology* 194(3), 425–440 (2011)
  17. Walter, J., Schermelleh, L., Cremer, M., Tashiro, S., Cremer, T.: Chromosome order in HeLa cells changes during mitosis and early G1, but is stably maintained during subsequent interphase stages. *J Cell Biology* 160(5), 685–697 (2003)
  18. Hatch, E., Hetzer, M.: Breaching the nuclear envelope in development and disease. *J Cell Biol* 205(2), 133–141 (Apr 2014)
  19. Coelho, L.P., Shariff, A., Murphy, R.F.: Nuclear Segmentation in Microscope Cell Images: A Hand-Segmented Dataset and Comparison of Algorithms. *IEEE International Symposium on Biomedical Imaging* 5193098, 518–521 (2009)
  20. Belevich, I., Joensuu, M., Kumar, D., Vihinen, H., Jokitalo, E.: Microscopy image browser: A platform for segmentation and analysis of multidimensional datasets. *PLOS Biology* 14(1), e1002340 (Jan 2016)
  21. Schnoor, J.L.: Citizen science. *Environmental Science & Technology* 41(17), 5923–5923 (Sep 2007)
  22. Karabag, C., Jones, M.L., Peddie, C.J., Weston, A.E., Collinson, L.M., Reyes-Aldasoro, C.C.: Automated segmentation of hela nuclear envelope from electron microscopy images. In: *Medical Image Understanding Analysis*. Springer (Jul 2018)
  23. Deerinck, T.J., Bushong, E., Thor, A., Ellisman, M.H.: NCMIR - National Center for Microscopy and Imaging Research. NCMIR methods for 3D EM: A new protocol for preparation of biological specimens for serial block-face SEM microscopy (2010)
  24. Jaccard, P.: Étude comparative de la distribution florale dans une portion des Alpes et des Jura. *Bull. del la Société Vaudoise des Sciences Naturelles* 37, 547–579 (1901)
  25. Etch A Cell. <https://www.zooniverse.org/projects/h-spiers/etch-a-cell>, accessed: 2018-01-17
